# Supplementary material for: Transcriptome analysis during berry development provides insights into co-regulated and altered gene expression between a seeded wine grape variety and its seedless somatic variant
Source: PubMed Central journal article supplement (PMC4301461; doi:10.1186/1471-2164-15-1030), 2014-11-27

Wild-type and Mutant E-L 15 & 27

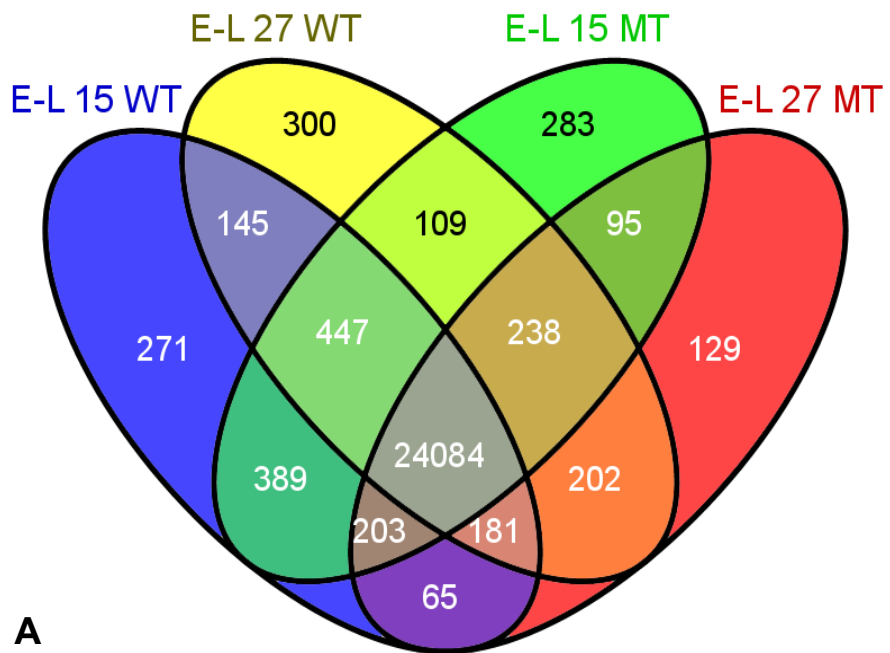

Wild-type and Mutant E-L 27 & 38

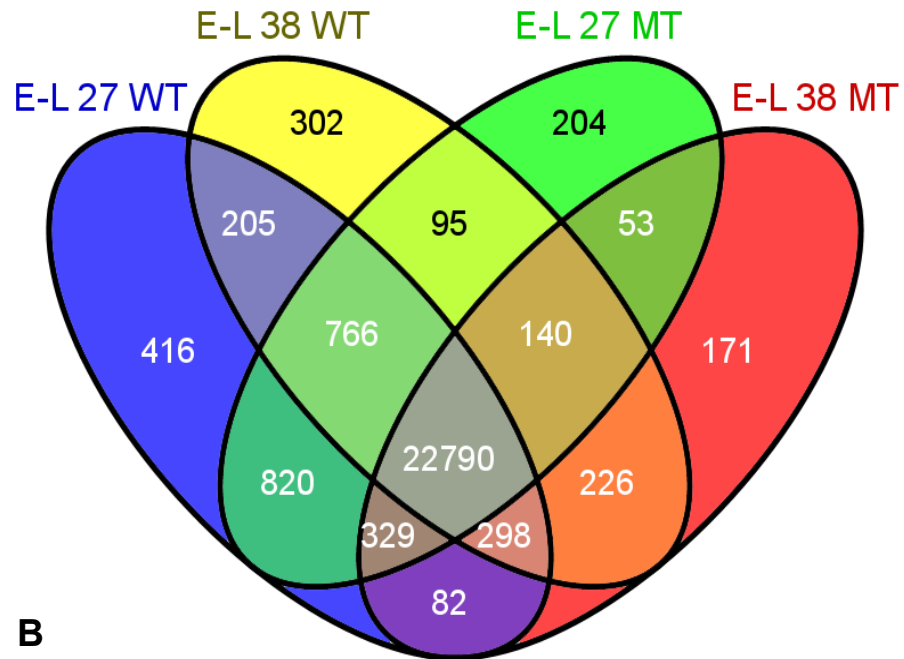

Supplement: 12864_2014_6843_MOESM9_ESM.pdf [file 12864_2014_6843_MOESM9_ESM.pdf]
